# Supplementary material
Source: MDPI journal article supplement (https://www.mdpi.com/2073-4344/8/5/208)

# Supplementary Material: Cross-Linked Enzyme Aggregates of Feruloyl Esterase Preparations from *Thermothelomyces thermophila* and *Talaromyces wortmannii*

Anastasia Zerva <sup>1</sup>, Io Antonopoulou <sup>1</sup>, Josefine Enman <sup>1</sup>, Laura Iancu <sup>2</sup>, Ulrika Rova <sup>1</sup> and Paul Christakopoulos <sup>1,\*</sup>

<sup>1</sup> Division of Chemical Engineering, Department of Civil, Environmental and Natural Resources Engineering, Luleå University of Technology, 97187 Luleå, Sweden; anastasia.zerva@ltu.se (A.Z.); io.antonopoulou@ltu.se (I.A.); Josefine.Enman@ltu.se (J.E.); Ulrika.Rova@ltu.se (U.R.)

<sup>2</sup> DuPont Industrial Biosciences, Nieuwe Kanaal 7-S, 6709 PA Wageningen, The Netherlands; Laura.Iancu@dupont.com

\* Correspondence: paul.christakopoulos@ltu.se; Tel.: +46-920-492510

Received: 18 April 2018; Accepted: 10 May 2018; Published: date

**Table S1.** Physicochemical properties of the studied FAEs .

| Enzyme  | MW (kDa) | Amino acids | Lysine residues | Predicted N-glyc | FAE type | Phylogenetic subfamily (SF) <sup>a</sup> | GenBank ID | Reference  |
|---------|----------|-------------|-----------------|------------------|----------|------------------------------------------|------------|------------|
| FAEA1   | 30       | 279         | 9               | 0                | A        | 5                                        | JF826027.1 | [11], [41] |
| FAEA2   | 31       | 302         | 5               | 1                | A        | 5                                        | JF826028.1 | [11], [41] |
| FAEB1   | 31       | 294         | 6               | 2                | B        | 6                                        | API68922.1 | [11]       |
| FAEB2   | 31       | 291         | 4               | 1                | B        | 6                                        | JF826029.1 | [11], [41] |
| FAE125  | 36       | 341         | 6               | 0                | A        | 5                                        | MF362595.1 | This work  |
| FAE68   | 60       | 556         | 20              | 10               | B        | 1                                        | MF362596.1 | This work  |
| FAE7262 | 37       | 357         | 6               | 2                | B        | 6                                        | MF362597.1 | This work  |
| MtFae1a | 31       | 291         | 4               | 1                | B        | 6                                        | AEO62008.1 | [11], [44] |

<sup>a</sup> According to [46]

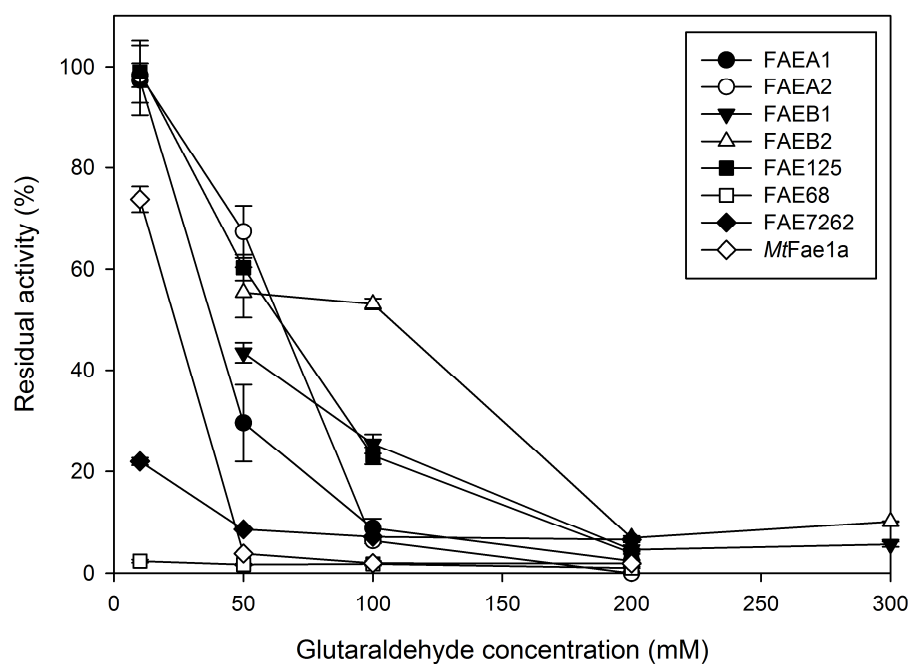

**Figure S1.** Residual FAE activity (%) of the soluble enzyme in the supernatant after CLEA removal, for all tested glutaraldehyde concentrations. Residual activity is presented as a percentage of the initial activity of the corresponding free enzymes. Reactions were performed as described in paragraph 4.2. Initial activity values for each FAE were as follows: FAEA1 1.85 U mL<sup>-1</sup>, FAEA2 3.36 U mL<sup>-1</sup>, FAEB1 3.57 U mL<sup>-1</sup>, FAEB2 2.62 U mL<sup>-1</sup>, FAE125 1.25 U mL<sup>-1</sup>, FAE68 4.98 U mL<sup>-1</sup>, FAE7262 3.38 U mL<sup>-1</sup>, MtFae1a 2.71 U mL<sup>-1</sup>.

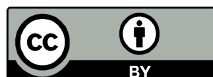

Supplement: s1 [file s1]
